# Supplementary material for: Meat Processing Waste as a Source of Nutrients and Its Effect on the Physicochemical Properties of Soil
Source: MDPI journal article supplement (doi:10.3390/su14031341), 2022-01-25
Supplement: s1 [file s1]

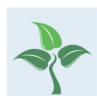

**Table S8.** Source of maize grain yield, t ha<sup>-1</sup>, \* Data published in the reference: Stępień, A.; Wojtkowiak, K.; Kolankowska, E. Use of Meat Industry Waste in the Form of Meat-and-Bone Meal in Fertilising Maize (*Zea mays* L.) for Grain. *Sustainability* **2021**, *13*, 2857. <https://doi.org/10.3390/su13052857>.

| Year/ Meat Bone Meal application | HLL     | HLA*    | Mean  |
|----------------------------------|---------|---------|-------|
| 2015/Without fertilization       | 2,42g   | 3,20d-g | 2,81c |
| 2015/Mineral fertilization       | 3,41d-g | 4,65c   | 4,03b |
| 2015/MBM 1.0 t ha <sup>-1</sup>  | 2,80fg  | 3,98c-f | 3,39b |
| 2015/MBM 2.0 t ha <sup>-1</sup>  | 3,03efg | 4,76c   | 2,89b |
| 2015/MBM 3.0 t ha <sup>-1</sup>  | 2,91fg  | 4,78c   | 3,85b |
| 2017/Without fertilization       | 1,12h   | 2,94fg  | 2,04d |
| 2017/Mineral fertilization       | 3,87c-g | 5,98ab  | 4,93a |
| 2017/MBM 1.0 t ha <sup>-1</sup>  | 3,05efg | 4,83bc  | 3,94b |
| 2017/MBM 2.0 t ha <sup>-1</sup>  | 4,28cd  | 6,36a   | 5,32a |
| 2017/MBM 3.0 t ha <sup>-1</sup>  | 4,21cde | 6,15a   | 5,18a |
| Without fertilization            | 1,77d   | 3,07c   | 2,42C |
| Mineral fertilization            | 3,64c   | 5,32b   | 4,48A |
| MBM 1.0 t ha <sup>-1</sup>       | 2,92c   | 4,40b   | 3,66B |
| MBM 2.0 t ha <sup>-1</sup>       | 3,66bc  | 5,56a   | 4,61A |
| MBM 3.0 t ha <sup>-1</sup>       | 3,56c   | 5,47b   | 4,51A |
| 2015 Y                           | 2,91z   | 4,27x   | 3,59B |
| 2017 Y                           | 3,31y   | 5,25w   | 4,28A |
| Mean                             | 3,11B   | 4,76A   | -     |

A,B — statistically homogenous groups (test Tuckey) depend on Year of Meat Bone Meal application

A,B — statistically homogenous groups (test Tuckey) depend on Type of soil

A,B — statistically homogenous groups (test Tuckey) depend on Meat Bone Meal application

w,x,y,z — statistically homogenous groups (test Tuckey) depend on Year of Meat Bone Meal application/Type of soil

a,b,c,d — statistically homogenous groups (test Tuckey) depend on Year of Meat Bone Meal application/ Meat Bone Meal application

a,b,c,d — statistically homogenous groups (test Tuckey) depend on Type of soil/ Meat Bone Meal application

a,b,c,d — statistically homogenous groups (test Tuckey) depend on Type of soil/ Meat Bone Meal application

a,b,c,d — statistically homogenous groups (test Tuckey) depend on Year of Meat Bone Meal application/Type of soil/ Meat Bone Meal application
